# Supplementary material for: Whole-Exome Sequencing and cfDNA Analysis Uncover Genetic Determinants of Melanoma Therapy Response in a Real-World Setting
Source: MDPI journal article supplement (doi:10.3390/ijms24054302), 2023-02-21
Supplement: s1 [file s1]

**Supplementary Table S1.** Real-world cohort of fresh tissue biopsies belonging to 36 melanoma patients.

| <b>BRAF V600+ Patients</b> |                         | <b>Total N=19</b> | <b>R</b> | <b>NR</b> |
|----------------------------|-------------------------|-------------------|----------|-----------|
| SEX                        | F                       |                   | 4        | 6*        |
|                            | M                       |                   | 4        | 5         |
| PRE-THERAPY BIOPSY         |                         |                   | 1        | 9*        |
| POST-THERAPY BIOPSY        |                         |                   | 7        | 2         |
| TUMOUR ONSET MEDIAN        |                         |                   | 55.5y    | 54.1y     |
| THERAPY                    | BRAF+MEKi               |                   | 6        | 7         |
|                            | Anti-PD-1               |                   | 2        | 1         |
|                            | Adjuvant with BRAF+MEKi |                   | 0        | 3*        |
| <b>BRAF V600- Patients</b> |                         | <b>Total N=17</b> | <b>R</b> | <b>NR</b> |
| SEX                        | F                       |                   | 3        | 3         |
|                            | M                       |                   | 6        | 5         |
| PRE-THERAPY BIOPSY         |                         |                   | 4        | 5         |
| POST-THERAPY BIOPSY        |                         |                   | 5        | 3         |
| TUMOUR ONSET MEDIAN        |                         |                   | 69.7y    | 62.7y     |

|         |                                    |   |   |
|---------|------------------------------------|---|---|
|         | Anti-PD-1                          | 6 | 3 |
|         | Anti-CTLA-4                        | 1 | 0 |
| THERAPY | Imatinib                           | 0 | 1 |
|         | Adjuvant with Anti-PD-1            | 2 | 3 |
|         | Ipilimumab/Adjuvant with Anti-PD-1 | 0 | 1 |

---

*Abbreviations: F: Female; M: Male; y: years; R: Responder; NR: Non-Responder; \*: 1 FFPE biopsy analysed.*

**Supplementary Table S2.** Association between genetic layout and response to therapy.

| VARIABLE                             | SAMPLES | RESPONSE TO THERAPY | MEDIAN | IQR         | Test statistic | p-value  |
|--------------------------------------|---------|---------------------|--------|-------------|----------------|----------|
| TMB                                  | ALL     | R                   | 22.89  | 10.61-44.28 | W = 197        | p= 0.271 |
|                                      |         | NR                  | 16.04  | 5.3-39      |                |          |
|                                      | BRAF+   | R                   | 25.76  | 13.49-51.84 | W = 46         | p= 0.904 |
|                                      |         | NR                  | 34.77  | 7.53-43.97  |                |          |
|                                      | BRAF-   | R                   | 21.91  | 10.51-44.28 | W = 51         | p=0.167  |
|                                      |         | NR                  | 10.4   | 4.22-24.95  |                |          |
| N mutations in melanoma driver genes | ALL     | R                   | 2      | 1-3         | W = 211        | p= 0.113 |
|                                      |         | NR                  | 3      | 2-5         |                |          |
|                                      | BRAF+   | R                   | 1.5    | 0.75-3.25   | W = 26.5       | p= 0.152 |
|                                      |         | NR                  | 3      | 1.5-5       |                |          |
|                                      | BRAF-   | R                   | 2      | 1-3         | W = 26         | p= 0.348 |
|                                      |         | NR                  | 3      | 2-3.5       |                |          |
| N CNVs in melanoma driver genes      | ALL     | R                   | 3      | 1-8         | W = 152.5      | p= 0.786 |
|                                      |         | NR                  | 4      | 0.5-11      |                |          |
|                                      | BRAF+   | R                   | 3.5    | 1.75-7.5    | W = 40         | p= 0.769 |
|                                      |         | NR                  | 9      | 0-11.5      |                |          |
|                                      | BRAF-   | R                   | 3      | 1-8         | W = 35         | p= 0.961 |
|                                      |         | NR                  | 3      | 1.75-5.5    |                |          |
| N DNA Damage Repair genes with LOH   | ALL     | R                   | 0      | 0-21        | W = 217        | p= 0.062 |
|                                      |         | NR                  | 12     | 0-35        |                |          |

|                                     |       |    |    |         |                              |          |
|-------------------------------------|-------|----|----|---------|------------------------------|----------|
| COSMIC Signatures                   | BRAF+ | R  | 0  | 0-6.75  | W = 57                       | p= 0.264 |
|                                     |       | NR | 12 | 0-21.5  |                              |          |
|                                     | BRAF- | R  | 0  | 0-21    | W = 52                       | p= 0.115 |
|                                     |       | NR | 20 | 8.25-47 |                              |          |
|                                     |       |    |    |         |                              |          |
|                                     | ALL   | R  | -  | -       | -                            | p= 0.754 |
|                                     |       | NR | -  | -       |                              |          |
|                                     | BRAF+ | R  | -  | -       | -                            | p= 0.699 |
|                                     |       | NR | -  | -       |                              |          |
|                                     | BRAF- | R  | -  | -       | -                            | p= 0.174 |
|                                     |       | NR | -  | -       |                              |          |
|                                     |       |    |    |         |                              |          |
| TERT promoter mutations<br>(Yes/No) | ALL   | R  | -  | -       | OR = 0.23 (CI = 0.02 - 1.58) | p= 0.118 |
|                                     |       | NR | -  | -       |                              |          |
|                                     | BRAF+ | R  | -  | -       | OR = 0 (CI = 0 - 2.31)       | p= 0.234 |
|                                     |       | NR | -  | -       |                              |          |
|                                     | BRAF- | R  | -  | -       | OR = 0.36 (CI = 0.02 - 5.11) | p= 0.580 |
|                                     |       | NR | -  | -       |                              |          |

Abbreviations: N = number of samples; R= responders; NR= non-responders; BRAF+= BRAF-mutated samples; BRAF-= BRAF wild-type samples; W= Wilcoxon rank sum test statistic; OR = odds ratio (in this case, odds that the outcome occurs in R group compared to the odds of the outcome occurring in NR); IQR = inter-quartile range; CI = 95% confidence interval; TMB= tumor mutation burden; LOH= loss of heterozygosity; CNV= copy number variation.

**Supplementary Table S3.** Loss Of Heterozygosity (LOH) in DNA Damage Repair (DDR) genes for our 36 melanomas patient's cohort.

| Gene   | Sample ID | <i>BRAF</i> V600 status | R |
|--------|-----------|-------------------------|---|
| AEN    | #47       | -                       | n |
| ALKBH1 | #56       | +                       | n |
| ALKBH3 | #56       | +                       | n |
|        | #4        | -                       | y |
|        | #54       | -                       | n |
| APEX1  | #56       | +                       | n |
| APEX2  | #39       | +                       | y |
|        | #19       | +                       | n |
|        | #43       | +                       | n |
|        | #56       | +                       | n |
|        | #1        | +                       | n |
|        | #8        | +                       | n |
|        | #10       | +                       | n |
|        | #50       | +                       | n |
|        | #4        | -                       | y |
|        | #59       | -                       | y |
|        | #32       | -                       | y |
|        | #45       | -                       | n |
|        | #55       | -                       | n |
|        | #63       | -                       | n |
|        | #47       | -                       | n |
|        | #57       | -                       | n |
| APLF   | #47       | -                       | n |
| APTX   | #30       | +                       | y |
|        | #56       | +                       | n |
|        | #10       | +                       | n |

|       |     |   |   |
|-------|-----|---|---|
|       | #59 | - | y |
|       | #32 | - | y |
|       | #45 | - | n |
|       | #54 | - | n |
|       | #47 | - | n |
| ASCC3 | #39 | + | y |
|       | #10 | + | n |
|       | #45 | - | n |
|       | #63 | - | n |
| ATM   | #39 | + | y |
|       | #56 | + | n |
|       | #4  | - | y |
|       | #54 | - | n |
| ATR   | #56 | + | n |
| ATRIP | #56 | + | n |
| ATRX  | #39 | + | y |
|       | #19 | + | n |
|       | #43 | + | n |
|       | #56 | + | n |
|       | #1  | + | n |
|       | #8  | + | n |
|       | #10 | + | n |
|       | #50 | + | n |
|       | #4  | - | y |
|       | #59 | - | y |
|       | #32 | - | y |
|       | #45 | - | n |
|       | #55 | - | n |
|       | #63 | - | n |
|       | #47 | - | n |
|       | #57 | - | n |

|        |     |   |   |
|--------|-----|---|---|
| BABAM1 | #59 | - | y |
| BARD1  | #47 | - | n |
| BCAS2  | #56 | + | n |
|        | #47 | - | n |
| BLM    | #63 | - | n |
|        | #47 | - | n |
| BRCA1  | #43 | + | n |
|        | #1  | + | n |
|        | #8  | + | n |
|        | #4  | - | y |
|        | #45 | - | n |
|        | #54 | - | n |
| BRCA2  | #43 | + | n |
|        | #8  | + | n |
|        | #10 | + | n |
| BRCC3  | #39 | + | y |
|        | #19 | + | n |
|        | #43 | + | n |
|        | #56 | + | n |
|        | #1  | + | n |
|        | #8  | + | n |
|        | #10 | + | n |
|        | #50 | + | n |
|        | #4  | - | y |
|        | #59 | - | y |
|        | #32 | - | y |
|        | #45 | - | n |
|        | #55 | - | n |
|        | #54 | - | n |
|        | #63 | - | n |
|        | #47 | - | n |

|        |     |   |   |
|--------|-----|---|---|
|        | #57 | - | n |
| CCNH   | #56 | + | n |
|        | #47 | - | n |
| CDC25A | #56 | + | n |
| CDC25C | #47 | - | n |
| CETN2  | #39 | + | y |
|        | #19 | + | n |
|        | #43 | + | n |
|        | #56 | + | n |
|        | #1  | + | n |
|        | #8  | + | n |
|        | #10 | + | n |
|        | #50 | + | n |
|        | #4  | - | y |
|        | #59 | - | y |
|        | #32 | - | y |
|        | #45 | - | n |
|        | #55 | - | n |
|        | #54 | - | n |
|        | #63 | - | n |
|        | #47 | - | n |
|        | #57 | - | n |
| CHAF1A | #59 | - | y |
|        | #54 | - | n |
| CHEK1  | #39 | + | y |
|        | #56 | + | n |
|        | #4  | - | y |
|        | #59 | - | y |
|        | #45 | - | n |
|        | #63 | - | n |
| CHEK2  | #47 | - | n |



|         |     |   |   |
|---------|-----|---|---|
| CUL3    | #59 | - | y |
|         | #47 | - | n |
| CUL5    | #39 | + | y |
|         | #56 | + | n |
|         | #4  | - | y |
|         | #54 | - | n |
| DCLRE1A | #39 | + | y |
|         | #30 | + | y |
|         | #19 | + | n |
|         | #56 | + | n |
|         | #10 | + | n |
|         | #45 | - | n |
|         | #63 | - | n |
| DCLRE1B | #56 | + | n |
|         | #47 | - | n |
| DCLRE1C | #30 | + | y |
|         | #19 | + | n |
|         | #56 | + | n |
|         | #10 | + | n |
|         | #45 | - | n |
|         | #63 | - | n |
| DDB1    | #19 | + | n |
|         | #56 | + | n |
|         | #4  | - | y |
| DDB2    | #56 | + | n |
|         | #4  | - | y |
| DMC1    | #50 | + | n |
|         | #54 | - | n |
|         | #47 | - | n |
| DNA2    | #39 | + | y |
|         | #30 | + | y |

|       |     |   |   |
|-------|-----|---|---|
|       | #19 | + | n |
|       | #56 | + | n |
|       | #10 | + | n |
|       | #59 | - | y |
|       | #45 | - | n |
| DNTT  | #39 | + | y |
|       | #30 | + | y |
|       | #19 | + | n |
|       | #56 | + | n |
|       | #10 | + | n |
|       | #45 | - | n |
|       | #63 | - | n |
| DUT   | #39 | + | y |
|       | #63 | - | n |
|       | #47 | - | n |
| EME1  | #4  | - | y |
| EME2  | #47 | - | n |
| ENDOV | #10 | + | n |
| ERCC2 | #59 | - | y |
| ERCC3 | #47 | - | n |
| ERCC4 | #59 | - | y |
|       | #47 | - | n |
| ERCC6 | #39 | + | y |
|       | #30 | + | y |
|       | #56 | + | n |
|       | #10 | + | n |
|       | #45 | - | n |
|       | #63 | - | n |
| ERCC8 | #57 | - | n |
| EXO1  | #39 | + | y |
| EXO5  | #47 | - | n |

|        |     |   |   |
|--------|-----|---|---|
| FAAP20 | #10 | + | n |
|        | #4  | - | y |
|        | #47 | - | n |
| FANCA  | #39 | + | y |
|        | #56 | + | n |
|        | #59 | - | y |
|        | #45 | - | n |
|        | #63 | - | n |
|        | #47 | - | n |
| FANCB  | #39 | + | y |
|        | #19 | + | n |
|        | #43 | + | n |
|        | #56 | + | n |
|        | #1  | + | n |
|        | #8  | + | n |
|        | #10 | + | n |
|        | #50 | + | n |
|        | #4  | - | y |
|        | #59 | - | y |
|        | #32 | - | y |
|        | #45 | - | n |
|        | #55 | - | n |
|        | #54 | - | n |
|        | #63 | - | n |
|        | #47 | - | n |
|        | #57 | - | n |
| FANCC  | #30 | + | y |
|        | #56 | + | n |
|        | #10 | + | n |
|        | #32 | - | y |
|        | #45 | - | n |

|         |     |   |   |
|---------|-----|---|---|
|         | #47 | - | n |
| FANCD2  | #39 | + | y |
|         | #56 | + | n |
| FANCE   | #56 | + | n |
| FANCF   | #56 | + | n |
|         | #4  | - | y |
|         | #54 | - | n |
|         | #63 | - | n |
| FANCG   | #30 | + | y |
|         | #56 | + | n |
|         | #10 | + | n |
|         | #32 | - | y |
|         | #45 | - | n |
|         | #54 | - | n |
|         | #47 | - | n |
| FANCI   | #47 | - | n |
| FANCL   | #56 | + | n |
|         | #4  | - | y |
|         | #47 | - | n |
| FANCM   | #56 | + | n |
|         | #59 | - | y |
| FEN1    | #56 | + | n |
|         | #4  | - | y |
| GADD45A | #47 | - | n |
| GADD45G | #30 | + | y |
|         | #56 | + | n |
|         | #10 | + | n |
|         | #59 | - | y |
|         | #32 | - | y |
|         | #45 | - | n |
|         | #47 | - | n |

|        |     |   |   |
|--------|-----|---|---|
| gen-01 | #47 | - | n |
| GTF2H1 | #56 | + | n |
|        | #4  | - | y |
|        | #54 | - | n |
| GTF2H3 | #4  | - | y |
|        | #45 | - | n |
| GTF2H5 | #39 | + | y |
|        | #56 | + | n |
|        | #59 | - | y |
|        | #32 | - | y |
|        | #45 | - | n |
|        | #63 | - | n |
| H2AFX  | #39 | + | y |
|        | #56 | + | n |
|        | #4  | - | y |
|        | #59 | - | y |
|        | #54 | - | n |
|        | #63 | - | n |
| HELQ   | #56 | + | n |
|        | #63 | - | n |
| HERC2  | #39 | + | y |
|        | #63 | - | n |
|        | #47 | - | n |
| HES1   | #56 | + | n |
| HFM1   | #47 | - | n |
| HLTF   | #56 | + | n |
| HMGB2  | #56 | + | n |
|        | #59 | - | y |
|        | #63 | - | n |
| HUS1   | #19 | + | n |
|        | #54 | - | n |

|        |     |   |   |
|--------|-----|---|---|
| IDH1   | #47 | - | n |
| INO80  | #39 | + | y |
|        | #19 | + | n |
|        | #63 | - | n |
|        | #47 | - | n |
| KAT5   | #56 | + | n |
|        | #4  | - | y |
|        | #54 | - | n |
| LIG4   | #30 | + | y |
|        | #56 | + | n |
|        | #57 | - | n |
| MAD2L2 | #10 | + | n |
|        | #4  | - | y |
|        | #47 | - | n |
| MBD4   | #56 | + | n |
| MGMT   | #39 | + | y |
|        | #30 | + | y |
|        | #19 | + | n |
|        | #56 | + | n |
|        | #10 | + | n |
|        | #45 | - | n |
|        | #63 | - | n |
| MLH1   | #56 | + | n |
| MLH3   | #56 | + | n |
| MMS19  | #39 | + | y |
|        | #30 | + | y |
|        | #19 | + | n |
|        | #56 | + | n |
|        | #10 | + | n |
|        | #63 | - | n |
| MNAT1  | #56 | + | n |

|          |     |   |   |
|----------|-----|---|---|
| MORF4L1  | #47 | - | n |
| MPG      | #47 | - | n |
| MRPL40   | #47 | - | n |
| MSH2     | #10 | + | n |
|          | #59 | - | y |
|          | #47 | - | n |
| MSH6     | #47 | - | n |
| MUS81    | #56 | + | n |
|          | #4  | - | y |
|          | #54 | - | n |
| MUTYH    | #47 | - | n |
| NBN      | #4  | - | y |
|          | #54 | - | n |
| NEIL1    | #59 | - | y |
|          | #47 | - | n |
| NEIL2    | #56 | + | n |
|          | #4  | - | y |
| NEIL3    | #56 | + | n |
|          | #50 | + | n |
|          | #59 | - | y |
|          | #63 | - | n |
| NFATC2IP | #47 | - | n |
| NHEJ1    | #47 | - | n |
| NSMCE1   | #59 | - | y |
|          | #47 | - | n |
| NSMCE2   | #47 | - | n |
| NSMCE4A  | #39 | + | y |
|          | #30 | + | y |
|          | #19 | + | n |
|          | #56 | + | n |
|          | #10 | + | n |

|        |     |   |   |
|--------|-----|---|---|
|        | #45 | - | n |
|        | #63 | - | n |
| NTHL1  | #47 | - | n |
| NUDT1  | #59 | - | y |
| NUDT18 | #56 | + | n |
|        | #4  | - | y |
| OGG1   | #39 | + | y |
|        | #56 | + | n |
| PALB2  | #47 | - | n |
| PARG   | #39 | + | y |
|        | #30 | + | y |
|        | #56 | + | n |
|        | #10 | + | n |
|        | #63 | - | n |
| PARP1  | #39 | + | y |
| PARP2  | #56 | + | n |
| PARP3  | #56 | + | n |
|        | #54 | - | n |
| PARP4  | #10 | + | n |
| PAXIP1 | #30 | + | y |
|        | #56 | + | n |
| PER1   | #19 | + | n |
|        | #45 | - | n |
| PLK3   | #47 | - | n |
| PLRG1  | #56 | + | n |
|        | #59 | - | y |
|        | #63 | - | n |
| PMS1   | #47 | - | n |
| PMS2   | #45 | - | n |
| PNKP   | #43 | + | n |
|        | #59 | - | y |



|       |     |   |   |
|-------|-----|---|---|
| POLA1 | #39 | + | y |
|       | #19 | + | n |
|       | #43 | + | n |
|       | #56 | + | n |
|       | #1  | + | n |
|       | #8  | + | n |
|       | #10 | + | n |
|       | #50 | + | n |
|       | #4  | - | y |
|       | #59 | - | y |
|       | #32 | - | y |
|       | #45 | - | n |
|       | #55 | - | n |
|       | #54 | - | n |
|       | #63 | - | n |
|       | #47 | - | n |
|       | #57 | - | n |
| POLB  | #56 | + | n |
|       | #4  | - | y |
| POLD3 | #56 | + | n |
|       | #4  | - | y |
| POLD4 | #56 | + | n |
|       | #4  | - | y |
|       | #59 | - | y |
|       | #54 | - | n |
| POLE  | #8  | + | n |
|       | #4  | - | y |
|       | #59 | - | y |
| POLE2 | #56 | + | n |
|       | #59 | - | y |
| POLE3 | #30 | + | y |

|        |     |   |   |
|--------|-----|---|---|
|        | #56 | + | n |
|        | #10 | + | n |
|        | #32 | - | y |
|        | #45 | - | n |
|        | #47 | - | n |
| POLE4  | #47 | - | n |
| POLG   | #47 | - | n |
| POLI   | #54 | - | n |
| POLL   | #39 | + | y |
|        | #30 | + | y |
|        | #19 | + | n |
|        | #10 | + | n |
|        | #45 | - | n |
|        | #63 | - | n |
| POLN   | #43 | + | n |
|        | #56 | + | n |
|        | #59 | - | y |
|        | #45 | - | n |
|        | #63 | - | n |
| POLQ   | #56 | + | n |
|        | #50 | + | n |
| PPP4C  | #47 | - | n |
| PPP4R1 | #43 | + | n |
|        | #59 | - | y |
| PPP4R2 | #56 | + | n |
| PRKDC  | #4  | - | y |
|        | #63 | - | n |
| PRPF19 | #56 | + | n |
|        | #4  | - | y |
| PTEN   | #39 | + | y |
|        | #30 | + | y |

|        |     |   |   |
|--------|-----|---|---|
|        | #56 | + | n |
|        | #10 | + | n |
|        | #45 | - | n |
|        | #63 | - | n |
| RAD18  | #39 | + | y |
|        | #56 | + | n |
| RAD23B | #30 | + | y |
|        | #56 | + | n |
|        | #10 | + | n |
|        | #32 | - | y |
|        | #45 | - | n |
|        | #47 | - | n |
| RAD50  | #47 | - | n |
| RAD51  | #39 | + | y |
|        | #19 | + | n |
|        | #63 | - | n |
|        | #47 | - | n |
| RAD51B | #56 | + | n |
|        | #56 | + | n |
|        | #45 | - | n |
| RAD52  | #59 | - | y |
|        | #63 | - | n |
| RAD54B | #4  | - | y |
| RAD54L | #47 | - | n |
| RAD9A  | #56 | + | n |
|        | #4  | - | y |
|        | #59 | - | y |
|        | #54 | - | n |
| RBBP8  | #59 | - | y |
| RBX1   | #47 | - | n |
| RECQL4 | #55 | - | n |

|        |     |   |   |
|--------|-----|---|---|
|        | #47 | - | n |
| RECQL5 | #10 | + | n |
| REV1   | #47 | - | n |
| REV3L  | #39 | + | y |
|        | #10 | + | n |
|        | #59 | - | y |
|        | #45 | - | n |
|        | #63 | - | n |
| RFC1   | #56 | + | n |
|        | #63 | - | n |
| RFC2   | #30 | + | y |
|        | #56 | + | n |
| RFC3   | #56 | + | n |
| RFC4   | #56 | + | n |
| RIF1   | #39 | + | y |
|        | #55 | - | n |
|        | #54 | - | n |
|        | #47 | - | n |
| RMI1   | #30 | + | y |
|        | #56 | + | n |
|        | #10 | + | n |
|        | #32 | - | y |
|        | #45 | - | n |
|        | #47 | - | n |
| RMI2   | #47 | - | n |
| RNF168 | #56 | + | n |
| RNF169 | #56 | + | n |
|        | #4  | - | y |
| RNF4   | #56 | + | n |
|        | #1  | + | n |
|        | #63 | - | n |

|        |     |   |   |
|--------|-----|---|---|
| RNMT   | #43 | + | n |
|        | #59 | - | y |
| RPA1   | #19 | + | n |
|        | #45 | - | n |
| RPA2   | #10 | + | n |
|        | #47 | - | n |
| RPA4   | #39 | + | y |
|        | #19 | + | n |
|        | #43 | + | n |
|        | #56 | + | n |
|        | #1  | + | n |
|        | #8  | + | n |
|        | #10 | + | n |
|        | #50 | + | n |
|        | #4  | - | y |
|        | #59 | - | y |
|        | #32 | - | y |
|        | #45 | - | n |
|        | #55 | - | n |
|        | #63 | - | n |
|        | #47 | - | n |
|        | #57 | - | n |
| RRM1   | #56 | + | n |
|        | #4  | - | y |
|        | #45 | - | n |
| RRM2   | #47 | - | n |
| RRM2B  | #59 | - | y |
|        | #47 | - | n |
| SETMAR | #39 | + | y |
|        | #30 | + | y |
|        | #56 | + | n |

|          |     |   |   |
|----------|-----|---|---|
| SHPRH    | #39 | + | y |
|          | #56 | + | n |
|          | #32 | - | y |
|          | #45 | - | n |
|          | #63 | - | n |
| SLX1A    | #45 | - | n |
|          | #45 | - | n |
|          | #47 | - | n |
| SLX4     | #47 | - | n |
| SMARCA4  | #54 | - | n |
| SMARCAD1 | #56 | + | n |
|          | #63 | - | n |
|          | #47 | - | n |
| SMARCC1  | #56 | + | n |
| SMC5     | #30 | + | y |
|          | #56 | + | n |
|          | #10 | + | n |
|          | #59 | - | y |
|          | #32 | - | y |
|          | #45 | - | n |
|          | #47 | - | n |
| SMC6     | #47 | - | n |
| SOX4     | #56 | + | n |
| SPRTN    | #39 | + | y |
| SWI5     | #30 | + | y |
|          | #56 | + | n |
|          | #10 | + | n |
|          | #32 | - | y |
|          | #45 | - | n |
|          | #47 | - | n |
| SWSAP1   | #54 | - | n |

|         |     |   |   |
|---------|-----|---|---|
| TCEA1   | #4  | - | y |
|         | #59 | - | y |
| TDP1    | #56 | + | n |
| TDP2    | #56 | + | n |
| TELO2   | #47 | - | n |
| TOP3A   | #19 | + | n |
| TOP3B   | #47 | - | n |
| TOPBP1  | #56 | + | n |
| TP53    | #19 | + | n |
|         | #45 | - | n |
| TP53BP1 | #39 | + | y |
|         | #63 | - | n |
|         | #63 | - | n |
|         | #47 | - | n |
| TREX1   | #56 | + | n |
| TREX2   | #39 | + | y |
|         | #19 | + | n |
|         | #43 | + | n |
|         | #56 | + | n |
|         | #1  | + | n |
|         | #8  | + | n |
|         | #10 | + | n |
|         | #50 | + | n |
|         | #4  | - | y |
|         | #59 | - | y |
|         | #32 | - | y |
|         | #45 | - | n |
|         | #55 | - | n |
|         | #54 | - | n |
|         | #63 | - | n |
|         | #47 | - | n |

|        |     |   |   |
|--------|-----|---|---|
|        | #57 | - | n |
| TTK    | #39 | + | y |
|        | #10 | + | n |
|        | #63 | - | n |
| TYMS   | #43 | + | n |
|        | #59 | - | y |
|        | #45 | - | n |
| UBE2A  | #39 | + | y |
|        | #19 | + | n |
|        | #43 | + | n |
|        | #56 | + | n |
|        | #1  | + | n |
|        | #8  | + | n |
|        | #10 | + | n |
|        | #50 | + | n |
|        | #4  | - | y |
|        | #59 | - | y |
|        | #32 | - | y |
|        | #45 | - | n |
|        | #55 | - | n |
|        | #63 | - | n |
|        | #47 | - | n |
|        | #57 | - | n |
| UBE2B  | #47 | - | n |
| UBE2T  | #39 | + | y |
| UBE2V2 | #4  | - | y |
|        | #63 | - | n |
| UIMC1  | #47 | - | n |
| USP1   | #47 | - | n |
| UVSSA  | #43 | + | n |
|        | #56 | + | n |



|        |     |   |   |
|--------|-----|---|---|
|        | #63 | - | n |
| WDR48  | #56 | + | n |
| WEE1   | #56 | + | n |
|        | #4  | - | y |
|        | #54 | - | n |
| WRN    | #56 | + | n |
|        | #4  | - | y |
| XAB2   | #54 | - | n |
| XPA    | #30 | + | y |
|        | #56 | + | n |
|        | #10 | + | n |
|        | #32 | - | y |
|        | #45 | - | n |
|        | #47 | - | n |
| XPC    | #56 | + | n |
| XRCC2  | #30 | + | y |
|        | #56 | + | n |
|        | #59 | - | y |
| XRCC3  | #56 | + | n |
| XRCC5  | #47 | - | n |
| XRCC6  | #47 | - | n |
| YWHAG  | #30 | + | y |
| ZSWIM7 | #19 | + | n |
|        | #45 | - | n |

*Abbreviations: R: Response; y: yes; n: no*

**Supplementary Table S4.** Mutational Signature.

Mutational Signature for our 36 melanomas patient's cohort and comparison between three different tools (DeconstructSigs, SigMa, and SigProfiler v3.2).

| Sample ID | <i>BRAF</i> V600 Status | deconstructSig       | SigMa           | ssSigProfiler |
|-----------|-------------------------|----------------------|-----------------|---------------|
| #1        | +                       | Signature_3          | Signature_3_hc  | SBS3          |
| #2        | +                       | Signature_3          | Signature_3_hc  | SBS3          |
| #3        | +                       | Signature_3          | Signature_3_hc  | SBS3          |
| #8        | +                       | Signature_3          | Signature_3_hc  | SBS3          |
| #10       | +                       | Signature_3          | Signature_3_hc  | SBS3          |
| #14       | +                       | Signature_3          | Signature_3_hc  | SBS3          |
| #17       | +                       | Signature_clock-like | Signature_clock | SBS5          |
| #19       | +                       | Signature_UV         | Signature_UV    | SBS7          |
| #26       | +                       | Signature_clock-like | Signature_clock | SBS5          |
| #30       | +                       | Signature_UV         | Signature_UV    | SBS7          |
| #37       | +                       | Signature_clock-like | Signature_clock | SBS5          |
| #39       | +                       | Signature_UV         | Signature_UV    | SBS7          |
| #40       | +                       | Signature_UV         | Signature_UV    | SBS7          |
| #42       | +                       | Signature_clock-like | Signature_3_hc  | SBS3          |
| #43       | +                       | Signature_clock-like | Signature_msi   | SBS1          |
| #50       | +                       | Signature_clock-like | Signature_clock | SBS5          |
| #56       | +                       | Signature_clock-like | Signature_clock | SBS5          |

|     |   |                      |                 |      |
|-----|---|----------------------|-----------------|------|
| #60 | + | Signature_UV         | Signature_UV    | SBS7 |
| #62 | + | Signature_UV         | Signature_UV    | SBS7 |
| #4  | - | Signature_UV         | Signature_UV    | SBS7 |
| #6  | - | Signature_3          | Signature_3_hc  | SBS3 |
| #7  | - | Signature_UV         | Signature_UV    | SBS7 |
| #18 | - | Signature_UV         | Signature_UV    | SBS7 |
| #20 | - | Signature_UV         | Signature_UV    | SBS7 |
| #21 | - | Signature_3          | Signature_3_hc  | SBS3 |
| #32 | - | Signature_UV         | Signature_UV    | SBS7 |
| #34 | - | Signature_3          | Signature_3_hc  | SBS3 |
| #38 | - | Signature_UV         | Signature_UV    | SBS7 |
| #45 | - | Signature_UV         | Signature_UV    | SBS7 |
| #46 | - | Signature_3          | Signature_3_hc  | SBS3 |
| #47 | - | Signature_clock-like | Signature_clock | SBS5 |
| #54 | - | Signature_clock-like | Signature_clock | SBS5 |
| #55 | - | Signature_clock-like | Signature_UV    | SBS7 |
| #57 | - | Signature_UV         | Signature_UV    | SBS7 |
| #59 | - | Signature_UV         | Signature_UV    | SBS7 |
| #63 | - | Signature_clock-like | Signature_clock | SBS5 |

---

Abbreviations: +: positive; -: negative

**Supplementary Table S5.** Copy Number Variations (CNVs) in melanoma driver genes detected by Whole-Exome Sequencing (WES) in common between the pre-therapy and post-therapy melanoma lesions.

| Gene         | CNV      | Sample ID | <i>BRAF</i> V600 status | R |
|--------------|----------|-----------|-------------------------|---|
|              |          | #39       | +                       | y |
| <i>PTEN</i>  | DELETION | #34       | -                       | n |
|              |          | #63       | -                       | n |
| <i>FBXW7</i> | DELETION | #63       | -                       | n |
| <i>KIT</i>   | DELETION | #63       | -                       | n |

|              |               |     |   |   |
|--------------|---------------|-----|---|---|
| <i>DDX3X</i> | DELETION      | #34 | - | n |
|              |               | #63 | - | n |
|              |               |     |   |   |
| <i>BRAF</i>  | AMPLIFICATION | #18 | - | n |
|              |               |     |   |   |
| <i>KIT</i>   | AMPLIFICATION | #21 | - | y |
|              |               | #34 | - | n |
|              |               |     |   |   |
| <i>STK19</i> | AMPLIFICATION | #21 | - | y |
|              |               | #7  | - | y |
|              |               | #34 | - | n |
|              |               |     |   |   |
|              |               |     |   |   |

|               |               |     |   |   |
|---------------|---------------|-----|---|---|
|               |               | #21 | - | y |
| <i>EZH2</i>   | AMPLIFICATION | #34 | - | n |
|               |               | #18 | - | n |
| <hr/>         |               |     |   |   |
| <i>NRAS</i>   | AMPLIFICATION | #34 | - | n |
| <hr/>         |               |     |   |   |
| <i>MAP2K2</i> | AMPLIFICATION | #34 | - | n |
| <hr/>         |               |     |   |   |
| <i>RAC1</i>   | AMPLIFICATION | #34 | - | n |
| <hr/>         |               |     |   |   |
| <i>SNX31</i>  | AMPLIFICATION | #34 | - | n |
| <hr/>         |               |     |   |   |
| <i>TACC1</i>  | AMPLIFICATION | #34 | - | n |
| <hr/>         |               |     |   |   |

|              |               |     |   |   |
|--------------|---------------|-----|---|---|
| <i>TERT</i>  | AMPLIFICATION | #34 | - | n |
| <hr/>        |               |     |   |   |
| <i>GNA11</i> | AMPLIFICATION | #34 | - | n |

---

*Abbreviations: R: Response; n: no; y: yes; -: Negative; +: Positive; CNV: Copy Number Variation.*

**Supplementary Table S6.** Copy Number Variations (CNVs) in melanoma driver genes detected by Whole-Exome Sequencing (WES) acquired in the post-therapy melanoma lesions.

| Gene | CNV           | Sample ID | BRAF V600 status | R |
|------|---------------|-----------|------------------|---|
| BRAF | AMPLIFICATION | #39§      | +                | y |
|      |               | #1§       | +                | n |
|      |               | #20       | -                | y |
| HRAS | AMPLIFICATION | #1        | +                | n |
|      |               | #20       | -                | y |
|      |               | #34       | -                | n |
| CDK4 | AMPLIFICATION | #1        | +                | n |



|               |               |     |   |   |
|---------------|---------------|-----|---|---|
| <i>KRAS</i>   | AMPLIFICATION | #18 | - | n |
| <hr/>         |               |     |   |   |
| <i>MAP2K1</i> | AMPLIFICATION | #20 | - | y |
| <hr/>         |               |     |   |   |
|               |               | #42 | + | y |
| <i>MAP2K2</i> | AMPLIFICATION |     |   |   |
|               |               | #1  | + | n |
| <hr/>         |               |     |   |   |
|               |               | #1  | + | n |
| <i>GNA11</i>  | AMPLIFICATION | #42 | + | y |
|               |               | #20 | - | y |
| <hr/>         |               |     |   |   |
| <i>EZH2</i>   | AMPLIFICATION | #42 | + | y |

|              |               |     |   |   |
|--------------|---------------|-----|---|---|
|              |               | #20 | - | y |
|              |               | #57 | - | n |
|              |               |     |   |   |
| <i>FBXW7</i> | AMPLIFICATION | #21 | - | y |
|              |               |     |   |   |
|              |               | #1  | + | n |
|              |               |     |   |   |
| <i>MTOR</i>  | AMPLIFICATION | #42 | + | y |
|              |               |     |   |   |
|              |               | #20 | - | y |
|              |               |     |   |   |
|              |               | #18 | - | n |
| <i>NRAS</i>  | AMPLIFICATION |     |   |   |
|              |               | #57 | - | n |
|              |               |     |   |   |

|       |               |     |   |   |
|-------|---------------|-----|---|---|
| PPP6C | AMPLIFICATION | #1  | + | n |
|       |               | #20 | - | y |
|       |               |     |   |   |
| RAC1  | AMPLIFICATION | #1  | + | n |
|       |               | #42 | + | y |
|       |               | #20 | - | y |
|       |               |     |   |   |
| RB1   | AMPLIFICATION | #1  | + | n |
|       |               |     |   |   |
| STK19 | AMPLIFICATION | #1  | + | n |
|       |               | #42 | + | y |

|               |               |     |   |   |
|---------------|---------------|-----|---|---|
| <i>TERT</i>   | AMPLIFICATION | #20 | - | y |
| <i>TP53</i>   | AMPLIFICATION | #20 | - | y |
| <i>WT1</i>    | AMPLIFICATION | #20 | - | y |
| <hr/>         |               |     |   |   |
| <i>FBXW7</i>  | DELETION      | #20 | - | y |
| <hr/>         |               |     |   |   |
| <i>CDKN2A</i> | DELETION      | #20 | - | y |
| <hr/>         |               |     |   |   |
| <i>CNOT9</i>  | DELETION      | #20 | - | y |
| <hr/>         |               |     |   |   |
| <i>CTNNB1</i> | DELETION      | #20 | - | y |
| <hr/>         |               |     |   |   |
| <i>DDX3X</i>  | DELETION      | #1  | + | n |
| <hr/>         |               |     |   |   |

|               |          |     |   |   |
|---------------|----------|-----|---|---|
|               |          | #20 | - | y |
| <hr/>         |          |     |   |   |
|               |          | #63 | - | n |
| <i>GNA11</i>  | DELETION |     |   |   |
|               |          | #57 | - | n |
| <hr/>         |          |     |   |   |
| <i>HRAS</i>   | DELETION | #42 | + | y |
| <hr/>         |          |     |   |   |
| <i>IDH1</i>   | DELETION | #20 | - | y |
| <hr/>         |          |     |   |   |
| <i>MAP2K1</i> | DELETION | #20 | - | y |
| <hr/>         |          |     |   |   |
|               |          | #63 | - | n |
| <i>MAP2K2</i> | DELETION |     |   |   |
|               |          | #57 | - | n |
| <hr/>         |          |     |   |   |

|              |          |     |   |   |
|--------------|----------|-----|---|---|
| <i>TACC1</i> | DELETION | #20 | - | y |
| <hr/>        |          |     |   |   |
| <i>TP53</i>  | DELETION | #63 | - | n |

---

*Abbreviations: R: Response; n: no; y: yes; -: Negative; +: Positive; CNV: Copy number variation; §: gain present in the pre-lesions and post lesion.*

**Supplementary Table S7.** Loss Of Function (LOF) variants in DNA Damage Repair (DDR) genes.

For each of 36 patients, exonic somatic LOF variants in DDR genes with an Allele Frequency (AF) at least 10% are reported. In bold the variants found in common in the two lesions of the same patient.

| Chr     | <i>BRAF</i> |   | Gene           | aa change                                 | Ref seq        | Coverage | AF   |
|---------|-------------|---|----------------|-------------------------------------------|----------------|----------|------|
|         | V600        | R |                |                                           |                |          |      |
|         | status      |   |                |                                           |                |          |      |
| #2      | +           | y | <i>TP53BP1</i> | p.Ser1359fs                               | NM_001141980.3 | 58       | 63.6 |
| #2      | +           | y | <i>DDB1</i>    | p.Arg989fs                                | NM_001923.5    | 45       | 42.9 |
| #17     | +           | y | <i>RAD51B</i>  | p.Gln371*                                 | NM_133509.4    | 76       | 20.0 |
| #39_PRE | +           | y | <i>TDG</i>     | p.Ile98fs                                 | NM_003211.6    | 195      | 20.0 |
| #39_PRE | +           | y | <i>CUL4B</i>   | p.Ser61fs                                 | NM_003588.3    | 63       | 12.8 |
| #39     | +           | y | <i>CUL5</i>    | p.Gln709*                                 | NM_003478.6    | 965      | 59.6 |
| #40     | +           | y | <i>MSH6</i>    | p.Asp1026fs                               | NM_000179.2    | 585      | 10.1 |
| #42     | +           | y | <i>ERCC6</i>   | p.Ala298delinsGlyPheSerSerTerSerValProSer | NM_000124.4    | 61       | 45.5 |

|     |   |   |                |                                           |  |                       |      |      |
|-----|---|---|----------------|-------------------------------------------|--|-----------------------|------|------|
| #42 | + | y | <i>MLH3</i>    | p.Asn629fs                                |  | <i>NM_001040108.1</i> | 182  | 11.4 |
| #10 | + | n | <i>MDC1</i>    | p.Arg944fs                                |  | <i>NM_014641.3.5</i>  | 202  | 12.5 |
| #10 | + | n | <i>TP53BP1</i> | p.Ser1359fs                               |  | <i>NM_001141980.3</i> | 88   | 50.0 |
| #10 | + | n | <i>POLM</i>    | p.Arg248*                                 |  | <i>NM_001284330.2</i> | 1488 | 30.3 |
| #10 | + | n | <i>ERCC6</i>   | p.Ala298delinsGlyPheSerSerTerSerValProSer |  | <i>NM_000124.4</i>    | 85   | 66.7 |
| #14 | + | n | <i>HERC2</i>   | p.Gln142fs                                |  | <i>NM_004667.5</i>    | 67   | 17.6 |
| #14 | + | n | <i>TP53BP1</i> | p.Ser1359fs                               |  | <i>NM_001141980.3</i> | 83   | 20.0 |
| #14 | + | n | <i>ERCC6</i>   | p.Ala298delinsGlyPheSerSerTerSerValProSer |  | <i>NM_000124.4</i>    | 92   | 26.9 |
| #14 | + | n | <i>LIG4</i>    | p.Thr554fs                                |  | <i>NM_001352604.1</i> | 173  | 23.0 |
| #14 | + | n | <i>SHPRH</i>   | p.Asp944fs                                |  | <i>NM_001042683.3</i> | 38   | 21.4 |



|          |   |   |                |                                           |  |                |     |      |
|----------|---|---|----------------|-------------------------------------------|--|----------------|-----|------|
| #19      | + | n | <i>PTEN</i>    | p.Arg303fs                                |  | NM_001085384.3 | 410 | 64.8 |
| #3       | + | n | <i>CHEK2</i>   | p.Ser499fs                                |  | NM_001005735.2 | 83  | 23.5 |
| #3       | + | n | <i>FANCE</i>   | p.Arg176fs                                |  | NM_021922.3    | 81  | 14.6 |
| #3       | + | n | <i>TP53BP1</i> | p.Ser1359fs                               |  | NM_001141980.3 | 60  | 25.0 |
| #3       | + | n | <i>ERCC6</i>   | p.Ala298delinsGlyPheSerSerTerSerValProSer |  | NM_000124.4    | 71  | 37.5 |
| #3       | + | n | <i>APEX2</i>   | p.Thr295fs                                |  | NM_014481      | 88  | 23.8 |
| #3       | + | n | <i>FANCA</i>   | p.Ala1215fs                               |  | NM_000135.4    | 81  | 18.9 |
| #3       | + | n | <i>TDP1</i>    | p.Asp346fs                                |  | NM_001008744.2 | 59  | 53.8 |
| #3       | + | n | <i>SHPRH</i>   | p.Glu131*                                 |  | NM_001042683.3 | 117 | 15.2 |
| #62_POST | + | n | <i>GEN1</i>    | p.Lys839fs                                |  | NM_001130009.3 | 368 | 45.0 |

|          |   |   |                |                                           |                |     |      |
|----------|---|---|----------------|-------------------------------------------|----------------|-----|------|
| #62_POST | + | n | <i>PMS1</i>    | p.Leu164fs                                | NM_001321049.2 | 269 | 44.1 |
| #6       | - | y | <i>RFC1</i>    | p.Thr132fs                                | NM_001204747.2 | 190 | 14.9 |
| #6       | - | y | <i>TP53BP1</i> | p.Ser980_Gly981insIleArgGly               | NM_001141980.3 | 36  | 33.3 |
| #6       | - | y | <i>ERCC6</i>   | p.Ala298delinsGlyPheSerSerTerSerValProSer | NM_000124.4    | 141 | 23.1 |
| #6       | - | y | <i>APEX2</i>   | p.Thr295fs                                | NM_014481      | 88  | 15.6 |
| #6       | - | y | <i>RBP1</i>    | p.Ter158Glnext*?                          | NM_001130992.2 | 45  | 18.2 |
| #20_PRE  | - | y | <i>APEX2</i>   | p.Thr295fs                                | NM_014481      | 51  | 50.0 |
| #20_PRE  | - | y | <i>ERCC6</i>   | p.Ala298delinsGlyPheSerSerTerSerValProSer | NM_000124.4    | 164 | 21.2 |
| #20_POST | - | y | <i>ERCC6</i>   | p.Ala298delinsGlyPheSerSerTerSerValProSer | NM_000124.4    | 115 | 41.2 |
| #20_POST | - | y | <i>LIG4</i>    | p.Thr554fs                                | NM_001352604.1 | 280 | 13.3 |

|          |   |   |         |                                                                                   |                |     |      |
|----------|---|---|---------|-----------------------------------------------------------------------------------|----------------|-----|------|
| #20_POST | - | y | REV3L   | p.Lys1044delinsAsnLeuTrpAspLeuCysPheSerGlnLysGluAsnLeuValTerThrTerHisHisTyrAsnSer | NM_001372078.1 | 101 | 23.1 |
| #20_POST | - | y | DCLRE1B | p.Lys290_Pro291insIleProValGlyProSerThrTerSerProSerPheGluThrHisArgLysAlaLeu       | NM_022836.4    | 115 | 20.0 |
| #20_POST | - | y | TP53BP1 | p.Thr514fs                                                                        | NM_001141980.3 | 129 | 16.7 |
| #21      | - | y | GTF2H1  | p.Trp33*                                                                          | NM_001142307.1 | 109 | 12.0 |
| #21      | - | y | TDP2    | p.Thr230fs                                                                        | NM_016614.3    | 103 | 33.3 |
| #21      | - | y | BRCA1   | p.Ser377fs                                                                        | NM_007300.4    | 254 | 27.5 |
| #21      | - | y | TP53BP1 | p.Ser1359fs                                                                       | NM_001141980.3 | 138 | 21.7 |
| #21      | - | y | ATRX    | p.Ala1410fs                                                                       | NM_000489.5    | 89  | 23.5 |
| #21      | - | y | RAD54B  | p.Lys132*                                                                         | NM_012415.3    | 279 | 18.8 |
| #38      | - | y | BRCA2   | p.Glu954*                                                                         | NM_000059.3    | 376 | 34.5 |

|         |   |   |         |                                                                                               |                |     |      |
|---------|---|---|---------|-----------------------------------------------------------------------------------------------|----------------|-----|------|
| #46     | - | y | ERCC6   | p.Ala298delinsGlyPheSerSerTerSerValProSer                                                     | NM_000124.4    | 78  | 37.5 |
| #59     | - | y | BLM     | p.Gln83*                                                                                      | NM_000057.4    | 688 | 11.1 |
| #34_PRE | - | n | TDP2    | p.Thr230fs                                                                                    | NM_016614.3    | 43  | 29.4 |
| #34_PRE | - | n | MDC1    | p.Val440_Leu441insAlaHisProGlyProProProHisGluLeuSerProAlaTerGluGlnLeuGlnProThrLeuProGlnHisPro | NM_014641.3.5  | 59  | 23.5 |
| #34_PRE | - | n | BRCA1   | p.Ser377fs                                                                                    | NM_007300.4    | 172 | 30.3 |
| #34_PRE | - | n | TP53BP1 | <b>p.Ser1359fs</b>                                                                            | NM_001141980.3 | 68  | 26.9 |
| #34     | - | n | TP53BP1 | <b>p.Ser1359fs</b>                                                                            | NM_001141980.3 | 66  | 15.4 |
| #34_PRE | - | n | CDC5L   | p.Gly604fs                                                                                    | NM_001253.4    | 159 | 10.3 |
| #34_PRE | - | n | ERCC6   | <b>p.Ala298delinsGlyPheSerSerTerSerValProSer</b>                                              | NM_000124.4    | 79  | 80.0 |
| #34     | - | n | ERCC6   | <b>p.Ala298delinsGlyPheSerSerTerSerValProSer</b>                                              | NM_000124.4    | 100 | 25.9 |

|         |   |   |       |                   |                |     |      |
|---------|---|---|-------|-------------------|----------------|-----|------|
| #34_PRE | - | n | REV1  | p.Leu289fs        | NM_001321454.2 | 51  | 23.1 |
| #34_PRE | - | n | LIG4  | <b>p.Thr554fs</b> | NM_001352604.1 | 182 | 15.6 |
| #34     | - | n | LIG4  | <b>p.Thr554fs</b> | NM_001352604.1 | 204 | 11.2 |
| #34     | - | n | FANCE | p.Arg176fs        | NM_021922.3    | 95  | 17.2 |
| #34     | - | n | MLH3  | p.Asn629fs        | NM_001040108.1 | 218 | 11.8 |
| #34     | - | n | ATR   | p.Val2230fs       | NM_001184.4    | 68  | 21.9 |
| #63_PRE | - | n | ERCC6 | <b>p.Arg1221*</b> | NM_000124.4    | 329 | 64.6 |
| #63     | - | n | ERCC6 | <b>p.Arg1221*</b> | NM_000124.4    | 340 | 65.4 |

---

Abbreviations: -:Negative; +: Positive; y: Yes; n: No; AF: Allele Frequency.

**Supplementary Table S8.** Loss of heterozygosity (LOH) in DNA Damage Repair (DDR) genes detected by Whole-Exome Sequencing (WES) in common between the pre-therapy and post-therapy melanoma lesions.

| Gene    | Sample ID | <i>BRAF</i><br>V600<br>status | R |
|---------|-----------|-------------------------------|---|
| APEX2   | #39       | +                             | y |
|         | #63       | -                             | n |
| ATRX    | #39       | +                             | y |
|         | #63       | -                             | n |
| BRCC3   | #39       | +                             | y |
|         | #63       | -                             | n |
| CETN2   | #39       | +                             | y |
|         | #63       | -                             | n |
| FANCB   | #39       | +                             | y |
|         | #63       | -                             | n |
| POLA1   | #39       | +                             | y |
|         | #63       | -                             | n |
| RPA4    | #39       | +                             | y |
|         | #63       | -                             | n |
| TREX2   | #39       | +                             | y |
|         | #63       | -                             | n |
| UBE2A   | #39       | +                             | y |
|         | #63       | -                             | n |
| ASCC3   | #63       | -                             | n |
| ATM     | #63       | -                             | n |
| CHEK1   | #63       | -                             | n |
| DCLRE1A | #63       | -                             | n |
| DCLRE1C | #63       | -                             | n |
| DNTT    | #63       | -                             | n |
| DUT     | #63       | -                             | n |

|          |     |   |   |
|----------|-----|---|---|
| ERCC6    | #63 | - | n |
| FANCA    | #63 | - | n |
| GTF2H5   | #63 | - | n |
| H2AFX    | #63 | - | n |
| HELQ     | #63 | - | n |
| HERC2    | #63 | - | n |
| HMGB2    | #63 | - | n |
| INO80    | #63 | - | n |
| MGMT     | #63 | - | n |
| MMS19    | #63 | - | n |
| NEIL3    | #63 | - | n |
| NSMCE4A  | #63 | - | n |
| PARG     | #63 | - | n |
| PLRG1    | #63 | - | n |
| POLL     | #63 | - | n |
| POLN     | #63 | - | n |
| PTEN     | #63 | - | n |
| RAD51    | #63 | - | n |
| REV3L    | #63 | - | n |
| RFC1     | #63 | - | n |
| RNF4     | #63 | - | n |
| SHPRH    | #63 | - | n |
| SMARCAD1 | #63 | - | n |
| TP53BP1  | #63 | - | n |
| TTK      | #63 | - | n |
| UVSSA    | #63 | - | n |

*Abbreviations: R: Response; Y: yes; N: no*

**Supplementary Table S9.** Loss of heterozygosity (LOH) in DNA Damage Repair (DDR) genes detected by Whole-Exome Sequencing (WES) acquired in the post-therapy melanoma lesions.

| Gene  | Sample ID | <i>BRAF</i> V600 status | R |
|-------|-----------|-------------------------|---|
| APEX2 | #1        | +                       | n |
|       | #62       | +                       | n |
|       | #21       | -                       | y |
| APTX  | #62       | +                       | n |
|       | #21       | -                       | y |
| ASCC3 | #39       | +                       | y |
|       | #62       | +                       | n |
|       | #21       | -                       | y |
| ATM   | #39       | +                       | y |
|       | #62       | +                       | n |
| ATRX  | #1        | +                       | n |
|       | #62       | +                       | n |
|       | #21       | -                       | y |
| BLM   | #62       | +                       | n |
|       | #63       | -                       | n |
| BRCA1 | #1        | +                       | n |
|       | #62       | +                       | n |
|       | #21       | -                       | y |
| BRCC3 | #1        | +                       | n |
|       | #62       | +                       | n |
|       | #21       | -                       | y |
| BRIP1 | #62       | +                       | n |
|       | #21       | -                       | y |
| CDC5L | #62       | +                       | n |
|       | #21       | -                       | y |
| CETN2 | #1        | +                       | n |



|         |     |   |   |
|---------|-----|---|---|
|         | #62 | + | n |
|         | #21 | - | y |
|         | #39 | + | y |
| CHEK1   | #62 | + | n |
|         | #62 | + | n |
| CHEK2   | #62 | + | n |
|         | #21 | - | y |
|         | #39 | + | y |
| CUL5    | #62 | + | n |
|         | #39 | + | y |
| DCLRE1A | #62 | + | n |
|         | #62 | + | n |
| DMC1    | #62 | + | n |
|         | #21 | - | y |
|         | #39 | + | y |
| DNA2    | #62 | + | n |
|         | #39 | + | y |
| DUT     | #62 | + | n |
|         | #62 | + | n |
| ENDOV   | #62 | + | n |
|         | #21 | - | y |
|         | #39 | + | y |
| ERCC6   | #62 | + | n |
|         | #62 | + | n |
| FAAP100 | #62 | + | n |
|         | #21 | - | y |
|         | #1  | + | n |
| FANCB   | #62 | + | n |
|         | #21 | - | y |
|         | #62 | + | n |
| FANCC   | #21 | - | y |
|         | #39 | + | y |
| FANCD2  | #62 | + | n |
|         | #62 | + | n |
| FANCE   | #62 | + | n |
|         | #21 | - | y |

|         |     |   |   |
|---------|-----|---|---|
| FANCF   | #62 | + | n |
|         | #63 | - | n |
| FANCG   | #62 | + | n |
|         | #21 | - | y |
| GADD45G | #62 | + | n |
|         | #21 | - | y |
|         | #39 | + | y |
| GTF2H5  | #62 | + | n |
|         | #21 | - | y |
| H2AFX   | #39 | + | y |
|         | #62 | + | n |
| HERC2   | #39 | + | y |
|         | #62 | + | n |
| HUS1    | #62 | + | n |
|         | #62 | + | n |
| INO80   | #39 | + | y |
|         | #62 | + | n |
| MMS19   | #39 | + | y |
|         | #62 | + | n |
| NSMCE4A | #39 | + | y |
|         | #62 | + | n |
| OGG1    | #39 | + | y |
|         | #62 | + | n |
| PARG    | #39 | + | y |
|         | #62 | + | n |
| PARP1   | #39 | + | y |
|         | #62 | + | n |
| POLA1   | #1  | + | n |
|         | #62 | + | n |
|         | #21 | - | y |
| POLE3   | #62 | + | n |
|         | #21 | - | y |

|        |     |   |   |
|--------|-----|---|---|
| POLH   | #62 | + | n |
|        | #21 | - | y |
| POLL   | #39 | + | y |
|        | #62 | + | n |
| PRKDC  | #62 | + | n |
|        | #63 | - | n |
| RAD18  | #39 | + | y |
|        | #62 | + | n |
| RAD23B | #62 | + | n |
|        | #21 | - | y |
| RAD51C | #62 | + | n |
|        | #21 | - | y |
| RAD52  | #62 | + | n |
|        | #63 | - | n |
| RBX1   | #62 | + | n |
|        | #21 | - | y |
| REV3L  | #39 | + | y |
|        | #62 | + | n |
|        | #21 | - | y |
| RMI1   | #62 | + | n |
|        | #21 | - | y |
| RNF4   | #1  | + | n |
|        | #62 | + | n |
| RNF8   | #62 | + | n |
|        | #21 | - | y |
| RPA4   | #1  | + | n |
|        | #62 | + | n |
|        | #21 | - | y |
| SETMAR | #39 | + | y |
|        | #62 | + | n |
| SHPRH  | #39 | + | y |
|        | #62 | + | n |

|         |     |   |   |
|---------|-----|---|---|
| SMC5    | #21 | - | y |
|         | #62 | + | n |
| SOX4    | #21 | - | y |
|         | #62 | + | n |
| SPRTN   | #21 | - | y |
|         | #39 | + | y |
| SWI5    | #62 | + | n |
|         | #21 | + | n |
| TDP2    | #62 | + | n |
|         | #21 | - | y |
| TOP3B   | #62 | + | n |
|         | #21 | - | y |
| TP53BP1 | #39 | + | y |
|         | #62 | + | n |
| TREX2   | #1  | + | n |
|         | #62 | + | n |
| TTK     | #21 | - | y |
|         | #39 | + | y |
| UBE2A   | #62 | + | n |
|         | #21 | - | y |
| UBE2T   | #1  | + | n |
|         | #62 | + | n |
| UBE2V2  | #39 | + | y |
|         | #62 | + | n |
| XRCC6   | #62 | + | n |
|         | #63 | - | n |
| AEN     | #62 | + | n |
|         | #21 | - | y |
| ALKBH1  | #62 | + | n |

|         |     |   |   |
|---------|-----|---|---|
| ALKBH2  | #62 | + | n |
| ALKBH3  | #62 | + | n |
| APEX1   | #62 | + | n |
| APLF    | #62 | + | n |
| ATR     | #62 | + | n |
| BABAM1  | #62 | + | n |
| BARD1   | #62 | + | n |
| BCAS2   | #62 | + | n |
| BRCA2   | #62 | + | n |
| CCNH    | #62 | + | n |
| CDC25B  | #62 | + | n |
| CDC25C  | #62 | + | n |
| CHAF1A  | #62 | + | n |
| CUL3    | #62 | + | n |
| DCLRE1C | #62 | + | n |
| DDB1    | #62 | + | n |
| DDB2    | #62 | + | n |
| DNTT    | #39 | + | y |
| EID3    | #62 | + | n |
| EME1    | #21 | - | y |
| EME2    | #62 | + | n |
| ERCC1   | #62 | + | n |
| ERCC2   | #62 | + | n |
| ERCC4   | #62 | + | n |
| ERCC5   | #62 | + | n |
| ERCC8   | #62 | + | n |
| EXO1    | #39 | + | y |
| EXO5    | #62 | + | n |
| FAAP20  | #62 | + | n |
| FAAP24  | #62 | + | n |
| FANCA   | #39 | + | y |
| FANCI   | #62 | + | n |

|          |     |   |   |
|----------|-----|---|---|
| FANCM    | #62 | + | n |
| FEN1     | #62 | + | n |
| GADD45A  | #62 | + | n |
| GEN1     | #62 | + | n |
| GTF2H3   | #62 | + | n |
| HELQ     | #62 | + | n |
| HES1     | #62 | + | n |
| HFM1     | #62 | + | n |
| HMGB1    | #62 | + | n |
| HMGB2    | #62 | + | n |
| IDH1     | #62 | + | n |
| LIG1     | #62 | + | n |
| LIG3     | #62 | + | n |
| LIG4     | #62 | + | n |
| MAD2L2   | #62 | + | n |
| MBD4     | #62 | + | n |
| MGMT     | #39 | + | y |
| MLH1     | #62 | + | n |
| MLH3     | #62 | + | n |
| MNAT1    | #62 | + | n |
| MORF4L1  | #62 | + | n |
| MPG      | #62 | + | n |
| MPLKIP   | #62 | + | n |
| MRPL40   | #21 | - | y |
| MSH2     | #62 | + | n |
| MSH3     | #62 | + | n |
| MSH6     | #62 | + | n |
| NABP2    | #62 | + | n |
| NBN      | #62 | + | n |
| NEIL2    | #62 | + | n |
| NEIL3    | #62 | + | n |
| NFATC2IP | #62 | + | n |

|        |     |   |   |
|--------|-----|---|---|
| NHEJ1  | #62 | + | n |
| NSMCE1 | #62 | + | n |
| NTHL1  | #62 | + | n |
| NUDT15 | #62 | + | n |
| NUDT18 | #62 | + | n |
| PALB2  | #62 | + | n |
| PARP2  | #62 | + | n |
| PARP3  | #62 | + | n |
| PARP4  | #62 | + | n |
| PARPBP | #62 | + | n |
| PAXIP1 | #62 | + | n |
| PER1   | #62 | + | n |
| PLK3   | #62 | + | n |
| PLRG1  | #62 | + | n |
| PMS1   | #62 | + | n |
| PMS2   | #62 | + | n |
| POLB   | #62 | + | n |
| POLD1  | #62 | + | n |
| POLD2  | #62 | + | n |
| POLD3  | #62 | + | n |
| POLD4  | #62 | + | n |
| POLE   | #62 | + | n |
| POLE2  | #62 | + | n |
| POLE4  | #62 | + | n |
| POLG   | #62 | + | n |
| POLI   | #62 | + | n |
| POLM   | #62 | + | n |
| POLQ   | #62 | + | n |
| PPP4C  | #62 | + | n |
| PPP4R1 | #62 | + | n |
| PPP4R2 | #62 | + | n |
| PRPF19 | #62 | + | n |

|          |     |   |   |
|----------|-----|---|---|
| PTEN     | #39 | + | y |
| RAD1     | #62 | + | n |
| RAD50    | #62 | + | n |
| RAD51    | #39 | + | y |
| RAD51B   | #62 | + | n |
| RAD51D   | #62 | + | n |
| RAD54B   | #62 | + | n |
| RAD9B    | #62 | + | n |
| RECQL4   | #62 | + | n |
| RECQL5   | #21 | - | y |
| REV1     | #62 | + | n |
| RFC1     | #62 | + | n |
| RFC2     | #62 | + | n |
| RFC3     | #62 | + | n |
| RFC4     | #62 | + | n |
| RFC5     | #62 | + | n |
| RIF1     | #39 | + | y |
| RMI2     | #62 | + | n |
| RNF168   | #62 | + | n |
| RNF169   | #62 | + | n |
| RNMT     | #62 | + | n |
| RPA1     | #62 | + | n |
| RPA2     | #62 | + | n |
| RPA3     | #62 | + | n |
| RRM1     | #62 | + | n |
| RRM2     | #62 | + | n |
| RRM2B    | #62 | + | n |
| RTEL1    | #62 | + | n |
| SLX1A    | #62 | + | n |
| SLX4     | #62 | + | n |
| SMARCAD1 | #62 | + | n |
| SMC6     | #62 | + | n |



|        |     |   |   |
|--------|-----|---|---|
| SMUG1  | #62 | + | n |
| SPO11  | #62 | + | n |
| TCEA1  | #62 | + | n |
| TDG    | #62 | + | n |
| TDP1   | #62 | + | n |
| TELO2  | #62 | + | n |
| TOP3A  | #62 | + | n |
| TOPBP1 | #62 | + | n |
| TP53   | #62 | + | n |
| TYMS   | #62 | + | n |
| UBE2B  | #62 | + | n |
| UBE2N  | #62 | + | n |
| UIMC1  | #62 | + | n |
| UNG    | #62 | + | n |
| USP1   | #62 | + | n |
| WDR48  | #62 | + | n |
| WRN    | #62 | + | n |
| XAB2   | #62 | + | n |
| XPA    | #21 | - | y |
| XPC    | #62 | + | n |
| XRCC1  | #62 | + | n |
| XRCC2  | #62 | + | n |
| XRCC3  | #62 | + | n |
| XRCC5  | #62 | + | n |
| YWHAB  | #62 | + | n |
| YWHAG  | #62 | + | n |
| ZSWIM7 | #62 | + | n |

---

*Abbreviations: R: Response; y: yes; n: no*

**Supplementary Table S10.** Circulating free DNA (cfDNA) mutational profile.

| Sample ID | Sex | R | Stage | <i>BRAF</i> V600 status | Previous treatment | Treatment         | cfDNA-NGS results         | AF%  | Tissue-WES results         | AF%      | Time variation from tissue to cfDNA (days) | Time variation from therapy to cfDNA (days) |
|-----------|-----|---|-------|-------------------------|--------------------|-------------------|---------------------------|------|----------------------------|----------|--------------------------------------------|---------------------------------------------|
| #2        | M   | Y | IV    | +                       | Y                  | BRAF+MEKi         | <i>BRAF</i> p.Val600Glu   | 4.8  | <i>BRAF</i> p.Val600Glu    | 52.4     | 15                                         | 369                                         |
|           |     |   |       |                         |                    |                   | <i>NRAS</i> p.Gln61Lys    | 5.0  | -                          | -        |                                            |                                             |
|           |     |   |       |                         |                    |                   | <i>CDK4</i> Amplification | 1.3  | <i>CDK4</i> Amplification  | 4 copies |                                            |                                             |
|           |     |   |       |                         |                    |                   | -                         | -    | <i>CCND3</i> amplification | 3 copies |                                            |                                             |
|           |     |   |       |                         |                    |                   | -                         | -    | <i>CCND1</i> amplification | 3 copies |                                            |                                             |
|           |     |   |       |                         |                    |                   | -                         | -    | <i>EGFR</i> amplification  | 3 copies |                                            |                                             |
|           |     |   |       |                         |                    |                   | -                         | -    | <i>FGFR3</i> amplification | 4 copies |                                            |                                             |
| #17       | F   | Y | IV    | +                       | Y                  | ICB               | <i>BRAF</i> p.Val600Glu   | 0.3  | <i>BRAF</i> p.Val600Glu    | 42.0     | 610                                        | 946                                         |
|           |     |   |       |                         |                    |                   | -                         | -    | <i>FGFR3</i> amplification | 4 copies |                                            |                                             |
|           |     |   |       |                         |                    |                   | -                         | -    | <i>CCND1</i> amplification | 3 copies |                                            |                                             |
| #26       | M   | Y | IV    | +                       | y                  | BRAF+MEKi         | -                         | -    | <i>BRAF</i> p.Val600Glu    | 8.0      | 39                                         | 482                                         |
|           |     |   |       |                         |                    |                   | -                         | -    | <i>FGFR3</i> amplification | 3 copies |                                            |                                             |
| #39       | M   | Y | IV    | +                       | Y                  | BRAF+MEKi and ICB | <i>BRAF</i> p.Val600Glu   | 32.6 | <i>BRAF</i> p.Val600Glu    | 97.0     | 137                                        | 1329                                        |
|           |     |   |       |                         |                    |                   | -                         | -    | <i>FGFR2</i> deletion      | 1 copy   |                                            |                                             |
| #1        | M   | N | IV    | +                       | Y                  | BRAF+MEKi         | <i>BRAF</i> p.Val600Glu   | 67.7 | <i>BRAF</i> p.Val600Glu    | 77.0     | 19                                         | 245                                         |
|           |     |   |       |                         |                    |                   | <i>NRAS</i> p.Gln61Lys    | 3.5  | -                          | -        |                                            |                                             |
|           |     |   |       |                         |                    |                   | <i>MAP2K2</i> p.Gln60Pro  | 0.9  | -                          | -        |                                            |                                             |
|           |     |   |       |                         |                    |                   | <i>MET</i> Amplification  | 4.3  | -                          | -        |                                            |                                             |
|           |     |   |       |                         |                    |                   | -                         | -    | <i>CCND1</i> amplification | 3 copies |                                            |                                             |
|           |     |   |       |                         |                    |                   | -                         | -    | <i>CCND3</i> amplification | 3 copies |                                            |                                             |
|           |     |   |       |                         |                    |                   | -                         | -    | <i>CDK4</i> amplification  | 4 copies |                                            |                                             |
| #3        | F   | N | IV    | +                       | N                  | -                 | -                         | -    | <i>FGFR3</i> amplification | 4 copies | 16                                         | 0                                           |
|           |     |   |       |                         |                    |                   | -                         | -    | <i>BRAF</i> p.Val600Glu    | 16.7     |                                            |                                             |

|        |   |   |      |   |   |                    |                    |      |                     |          |     |      |
|--------|---|---|------|---|---|--------------------|--------------------|------|---------------------|----------|-----|------|
|        |   |   |      |   |   |                    | SMO p.Pro641Ala    | 50   | -                   | -        |     |      |
|        |   |   |      |   |   |                    | -                  | -    | CCND1 amplification | 3 copies |     |      |
|        |   |   |      |   |   |                    | -                  | -    | CDK4 amplification  | 3 copies |     |      |
|        |   |   |      |   |   |                    | -                  | -    | FGFR3 amplification | 5 copies |     |      |
|        |   |   |      |   |   |                    | -                  | -    | EGFR amplification  | 3 copies |     |      |
| #8_T1  | M | N | IV   | + | N | -                  | -                  | -    | BRAF p.Val600Glu    | 22       | 14  | 0    |
|        |   |   |      |   |   |                    | -                  | -    | CCND1 amplification | 3 copies |     |      |
|        |   |   |      |   |   |                    | -                  | -    | EGFR amplification  | 3 copies |     |      |
|        |   |   |      |   |   |                    | -                  | -    | FGFR3 amplification | 3 copies |     |      |
| #8_T2  | M | N | IV   | + | Y | BRAF+MEKi          | BRAF p.Val600Glu   | 3.8  | BRAF p.Val600Glu    | 22       | 271 | 257  |
|        |   |   |      |   |   |                    | BRAF p.Val600Met   | 0.8  | -                   | -        |     |      |
|        |   |   |      |   |   |                    | PDGFRA p.Ala633Thr | 0.24 | -                   | -        |     |      |
| #10    | F | N | IV   | + | Y | BRAF+MEKi and ICB  | BRAF p.Val600Glu   | 8.8  | BRAF p.Val600Glu    | 60.0     | 289 | 461  |
|        |   |   |      |   |   |                    | GNA11 p.Gln209Leu  | 3.7  | -                   | -        |     |      |
|        |   |   |      |   |   |                    | -                  | -    | FGFR3 amplification | 4 copies |     |      |
|        |   |   |      |   |   |                    | -                  | -    | EGFR amplification  | 3 copies |     |      |
|        |   |   |      |   |   |                    | -                  | -    | CDK6 amplification  | 3 copies |     |      |
|        |   |   |      |   |   |                    | -                  | -    | CCND3 amplification | 3 copies |     |      |
| #14    | F | N | IV   | + | Y | ICB                | BRAF p.Val600Glu   | 2.4  | BRAF p.Val600Glu    | 43.8     | 51  | 21   |
|        |   |   |      |   |   |                    | PIK3CA p.Asn345Lys | 1.2  | -                   | -        |     |      |
|        |   |   |      |   |   |                    | -                  | -    | CCND1 amplification | 3 copies |     |      |
|        |   |   |      |   |   |                    | -                  | -    | EGFR amplification  | 3 copies |     |      |
|        |   |   |      |   |   |                    | -                  | -    | FGFR3 amplification | 4 copies |     |      |
| #19    | M | N | IV   | + | Y | BRAF+MEKi          | BRAF p.Val600Glu   | 0.7  | BRAF p.Val600Glu    | 36.4     | 83  | 56   |
|        |   |   |      |   |   |                    | NRAS p.Gln61Arg    | 0.2  | -                   | -        |     |      |
|        |   |   |      |   |   |                    | -                  | -    | FGFR2 deletion      | 1 copy   |     |      |
| #60_T1 | F | N | IIIB | + | N | BRAF+MEKi adjuvant | -                  | -    | BRAF p.Val600Glu    | 76.0     | 28  | 569  |
| #60_T2 | F | N | IIIB | + | N | BRAF+MEKi adjuvant | -                  | -    | BRAF p.Val600Glu    | 76.0     | 329 | 871  |
| #60_T3 | F | N | IIIB | + | N | BRAF+MEKi adjuvant | -                  | -    | BRAF p.Val600Glu    | 76.0     | 656 | 1198 |
| #62_T1 | M | N | IV   | + | N | -                  | BRAF p.Val600Glu   | 12.3 | BRAF p.Val600Glu    | 22.8     | 0   | 0    |

|        |   |   |    |   |   |                           |                     |             |                     |          |     |      |
|--------|---|---|----|---|---|---------------------------|---------------------|-------------|---------------------|----------|-----|------|
|        |   |   |    |   |   |                           | PIK3CA p.Glu545Lys  | 0.4         | -                   | -        |     |      |
| #62_T2 | M | N | IV | + | N | BRAF+MEKi                 | BRAF p.Val600Glu    | 39.2        | BRAF p.Val600Glu    | 17.0     |     |      |
|        |   |   |    |   |   |                           | GNA11 p.Gln209Leu   | 15.7        | -                   | -        | -7  | 110  |
|        |   |   |    |   |   |                           | PIK3CA p.Glu545Lys  | 1.3         | -                   | -        |     |      |
| #7     | F | Y | IV | - | N | ICB                       | BRAF p.Val600Glu    | 0.8         | -                   | -        |     |      |
|        |   |   |    |   |   |                           | KIT p. Lys642Glu    | 0.5         | -                   | -        |     |      |
|        |   |   |    |   |   |                           | MET p.Arg988Cys 5   | 51.8        | -                   | -        | 825 | 1002 |
|        |   |   |    |   |   |                           | -                   | -           | IDH1 p.Arg132Cys    | 23.0     |     |      |
|        |   |   |    |   |   |                           | -                   | -           | CCND3 amplification | 3 copies |     |      |
| #57    | M | N | IV | - | Y | ICB adjuvant and Imatinib | BRAF p.Gly469Ala    | 46.7        | BRAF p.Gly469Ala    | 58.7     |     |      |
|        |   |   |    |   |   |                           | KIT p.Lys642Glu     | 34.6        | KIT p.Lys642Glu     | 47.0     |     |      |
|        |   |   |    |   |   |                           | EGFR amplifications | 1.32 copies | EGFR amplifications | 3 copies | -6  | 441  |
|        |   |   |    |   |   |                           | CDK6 amplifications | 1.42 copies | CDK6 amplifications | 3 copies |     |      |
|        |   |   |    |   |   |                           | MET amplifications  | 1.31 copies | -                   | -        |     |      |

Abbreviations: R: Response; Y: yes; N: no; AF: Allele Frequency; ICB: Immunological Checkpoint Blocking; BRAF+MEKi: BRAF and MEK inhibitors.

**Supplementary Table S11.** Clinical characteristics of the enrolled patients.

| Patient ID | BRAF V600 Status | Adjuvant therapy | 1st line therapy | RECIST BOR 1st line therapy | PFS 1st line therapy | 2nd line therapy | RECIST BOR 2nd line therapy | PFS 2nd line therapy | iAEs (G3-G5) | CLINICAL BENEFIT |    |     |
|------------|------------------|------------------|------------------|-----------------------------|----------------------|------------------|-----------------------------|----------------------|--------------|------------------|----|-----|
|            |                  |                  |                  |                             |                      |                  |                             |                      |              | Adjuvant         | TT | ICI |
| #1         | +                | No               | BRAF+MEKi        | SD                          | 7,53                 | Anti-PD-1        | PD                          | 0,93                 | No           | NA               | 0  | 0   |
| #2         | +                | No               | BRAF+MEKi        | SD                          | 11,10                | Anti-PD-1        | PD                          | 2,93                 | No           | NA               | 1  | 0   |
| #3         | +                | No               | BRAF+MEKi        | PD                          | 3,07                 | No               | NA                          | NA                   | No           | NA               | 0  | NA  |

|    |   |    |           |    |      |    |    |    |    |    |   |    |
|----|---|----|-----------|----|------|----|----|----|----|----|---|----|
| #8 | + | No | BRAF+MEKi | SD | 8,17 | No | NA | NA | No | NA | 0 | NA |
|----|---|----|-----------|----|------|----|----|----|----|----|---|----|

|     |   |    |           |    |      |           |    |      |    |    |   |   |
|-----|---|----|-----------|----|------|-----------|----|------|----|----|---|---|
| #10 | + | No | BRAF+MEKi | SD | 5,73 | Anti-PD-1 | PR | 9,07 | No | NA | 0 | 1 |
|-----|---|----|-----------|----|------|-----------|----|------|----|----|---|---|

|     |   |    |                            |    |      |           |    |      |              |    |   |   |
|-----|---|----|----------------------------|----|------|-----------|----|------|--------------|----|---|---|
| #14 | + | No | Anti-CTLA-4 +<br>Anti-PD-1 | PD | 1,37 | BRAF+MEKi | PD | 4,73 | Colitis (G4) | NA | 0 | 0 |
|-----|---|----|----------------------------|----|------|-----------|----|------|--------------|----|---|---|

|     |   |    |           |    |       |    |    |    |                |    |    |   |
|-----|---|----|-----------|----|-------|----|----|----|----------------|----|----|---|
| #17 | + | No | Anti-PD-1 | SD | 11,20 | No | NA | NA | Pneumonia (G1) | NA | NA | 1 |
|-----|---|----|-----------|----|-------|----|----|----|----------------|----|----|---|

|     |   |    |           |    |      |           |    |      |    |    |   |   |
|-----|---|----|-----------|----|------|-----------|----|------|----|----|---|---|
| #19 | + | No | BRAF+MEKi | SD | 4,20 | Anti-PD-1 | PD | 0,37 | No | NA | 0 | 0 |
|-----|---|----|-----------|----|------|-----------|----|------|----|----|---|---|

|     |   |    |           |    |       |           |    |      |    |    |   |    |
|-----|---|----|-----------|----|-------|-----------|----|------|----|----|---|----|
| #26 | + | No | BRAF+MEKi | PR | 13,07 | BRAF+MEKi | PD | 5,43 | No | NA | 1 | NA |
|-----|---|----|-----------|----|-------|-----------|----|------|----|----|---|----|

|     |   |    |           |    |       |           |    |      |          |    |    |   |
|-----|---|----|-----------|----|-------|-----------|----|------|----------|----|----|---|
| #30 | + | No | Anti-PD-1 | PR | 7,93  | No        | NA | NA   | Vitiligo | NA | NA | 1 |
|     |   |    |           |    |       |           |    |      | No       |    |    |   |
| #37 | + | No | BRAF+MEKi | PR | 20,33 | Anti-PD-1 | PD | 1,46 |          | NA | 1  | 0 |
|     |   |    |           |    |       |           |    |      | No       |    |    |   |
| #39 | + | No | BRAF+MEKi | PR | 24,97 | Anti-PD-1 | SD | 7,33 |          | NA | 1  | 1 |



No

|     |   |    |           |    |       |           |    |      |  |    |   |   |
|-----|---|----|-----------|----|-------|-----------|----|------|--|----|---|---|
| #40 | + | No | BRAF+MEKi | PR | 19,63 | Anti-PD-1 | SD | 12,2 |  | NA | 1 | 1 |
|-----|---|----|-----------|----|-------|-----------|----|------|--|----|---|---|

No

|     |   |    |           |    |       |    |    |    |  |    |   |    |
|-----|---|----|-----------|----|-------|----|----|----|--|----|---|----|
| #42 | + | No | BRAF+MEKi | PR | 20,10 | No | NA | NA |  | NA | 1 | NA |
|-----|---|----|-----------|----|-------|----|----|----|--|----|---|----|

No

|     |   |                               |           |    |      |    |    |    |  |   |   |    |
|-----|---|-------------------------------|-----------|----|------|----|----|----|--|---|---|----|
| #43 | + | Adjuvant<br>with<br>BRAF+MEKi | BRAF+MEKi | PR | 4,90 | No | NA | NA |  | 0 | 0 | NA |
|-----|---|-------------------------------|-----------|----|------|----|----|----|--|---|---|----|

|     |   |                               |           |    |      |              |    |      |    |   |    |    |
|-----|---|-------------------------------|-----------|----|------|--------------|----|------|----|---|----|----|
|     |   |                               |           |    |      |              |    |      | No |   |    |    |
| #50 | + | No                            | Anti-PD-1 | PD | 1,00 | BRAF+MEKi    | PR | 2,96 |    | 0 | 0  | 0  |
|     |   |                               |           |    |      |              |    |      | No |   |    |    |
| #56 | + | Adjuvant<br>with<br>BRAF+MEKi | Anti-PD-1 | PD | 2,00 | Chemotherapy | PD | 1,93 |    | 0 | NA | 0  |
|     |   |                               |           |    |      |              |    |      | No |   |    |    |
| #60 | + | Adjuvant<br>with<br>BRAF+MEKi | No        | NA | NA   | No           | NA | NA   |    | 0 | NA | NA |

|     |   |                                |             |    |      |           |    |      |                                 |    |    |   |
|-----|---|--------------------------------|-------------|----|------|-----------|----|------|---------------------------------|----|----|---|
|     |   | Adjuvant<br>with anti-<br>PD-1 |             |    |      |           |    |      |                                 | 0  |    |   |
| #62 | + | No                             | BRAF+MEKi   | PR | 3,60 | Anti-PD-1 | PD | 1,2  | No                              | NA | 0  | 0 |
| #4  | - | No                             | Anti-CTLA-4 | PD | 5,27 | Anti-PD-1 | PR | 13,1 | Thyroiditis and<br>hypophysitis | NA | NA | 1 |

|     |   |    |           |    |       |              |    |      |                    |    |    |   |
|-----|---|----|-----------|----|-------|--------------|----|------|--------------------|----|----|---|
| #6  | - | No | Anti-PD-1 | SD | 10,30 | Anti-CTLA-4  | PR | 6,76 | No                 | NA | NA | 1 |
| #7  | - | No | Anti-PD-1 | PR | 64,20 | No           | NA | NA   | Bullous pemphigoid | NA | NA | 1 |
| #18 | - | No | Anti-PD-1 | PD | 5,90  | Chemotherapy | PD | 0,77 | No                 | NA | NA | 0 |

|     |   |                                  |           |    |      |             |    |       |          |    |    |    |
|-----|---|----------------------------------|-----------|----|------|-------------|----|-------|----------|----|----|----|
| #20 | - | No                               | Anti-PD-1 | SD | 3,73 | Anti-PD-1   | CR | 13,06 | No       | NA | NA | 1  |
| #21 | - | Anti-PD-1<br>+/- anti-<br>CTLA-4 | No        | NA | NA   | No          | NA | NA    | Vitiligo | 1  | NA | NA |
| #32 | - | No                               | Anti-PD-1 | PD | 9,33 | Anti CTLA-4 | PR | 13,86 | Vitiligo | NA | NA | 1  |

|     |   |    |           |    |      |    |    |    |    |    |    |   |
|-----|---|----|-----------|----|------|----|----|----|----|----|----|---|
| #34 | - | No | Anti-PD-1 | PD | 2,80 | No | NA | NA | No | NA | NA | 0 |
|-----|---|----|-----------|----|------|----|----|----|----|----|----|---|

|     |   |    |           |    |      |             |    |       |                    |    |    |   |
|-----|---|----|-----------|----|------|-------------|----|-------|--------------------|----|----|---|
| #38 | - | No | Anti-PD-1 | PD | 4,57 | Anti-CTLA-4 | SD | 10,86 | Amylase and lipase | NA | NA | 1 |
|-----|---|----|-----------|----|------|-------------|----|-------|--------------------|----|----|---|

|     |   |    |           |    |      |    |    |    |    |    |    |   |
|-----|---|----|-----------|----|------|----|----|----|----|----|----|---|
| #45 | - | No | Anti-PD-1 | PD | 1,53 | No | NA | NA | No | NA | NA | 0 |
|-----|---|----|-----------|----|------|----|----|----|----|----|----|---|

|     |   |                                |           |    |       |             |      |     |                                 |    |    |    |
|-----|---|--------------------------------|-----------|----|-------|-------------|------|-----|---------------------------------|----|----|----|
| #46 | - | No                             | Anti-PD-1 | PR | 29,43 | No          | NONo | NA  | Hypothyroidism<br>and arthritis | NA | NA | 1  |
| #47 | - | Adjuvant<br>with anti-<br>PD-1 | c-Kit-i   | PR | 6,33  | Anti-CTLA-4 | PD   | 1,1 | No                              | 0  | 0  | 0  |
| #54 | - | Adjuvant<br>with anti-<br>PD-1 | No        | NA | NA    | NA          | NA   | NA  | Pancreatitis                    | 0  | NA | NA |

|     |   |                                |             |    |      |              |    |     |          |   |    |    |
|-----|---|--------------------------------|-------------|----|------|--------------|----|-----|----------|---|----|----|
| #55 | - | Adjuvant<br>with anti-<br>PD-1 | Anti-CTLA-4 | PD | 3,80 | NA           | NA | NA  | Diarrhea | 0 | NA | 0  |
| #57 | - | Adjuvant<br>with anti-<br>PD-1 | c-Kit-i     | PR | 8,03 | Chemotherapy | PD | 1,8 | No       | 0 | 0  | 0  |
| #59 | - | Adjuvant<br>with anti-<br>PD-1 | No          | NA | NA   | NA           | NA | NA  | No       | 1 | NA | NA |



|     |   |                                |           |    |      |    |    |    |    |   |    |   |
|-----|---|--------------------------------|-----------|----|------|----|----|----|----|---|----|---|
| #63 | - | Adjuvant<br>with anti-<br>PD-1 | Anti-PD-1 | SD | 4,47 | NA | NA | NA | No | 0 | NA | 1 |
|-----|---|--------------------------------|-----------|----|------|----|----|----|----|---|----|---|

---

Anti-PD-1: nivolumab, pembrolizumab; Anti-CTLA-4: ipilimumab; BRAF+MEKi: vemurafenib + cobimetinib, dabrafenib + trametinib, encorafenib + binimetinib; c-KITi: imatinib.

*Abbreviations:* PD: NA: Not Available; SD: Stable Disease; PR: Partial Response; CR: Complete Response; PD: Disease Progression; ICB: Immunological Checkpoint Blocking; BOR: Best Overall Response; PFS: Progression Free Survival; iAEs. immuno-related Adverse Events; O: No clinical Benefit; 1: Clinical Benefit.
